# Supplementary material for: Seasonal extrema of sea surface temperature in CMIP6 models
Source: Copernicus journal article supplement (doi:10.5194/os-2021-102), 2021-10-27
Supplement: Supplementary file 1 [file os-2021-102-supplement.pdf]

# Supplementary materials

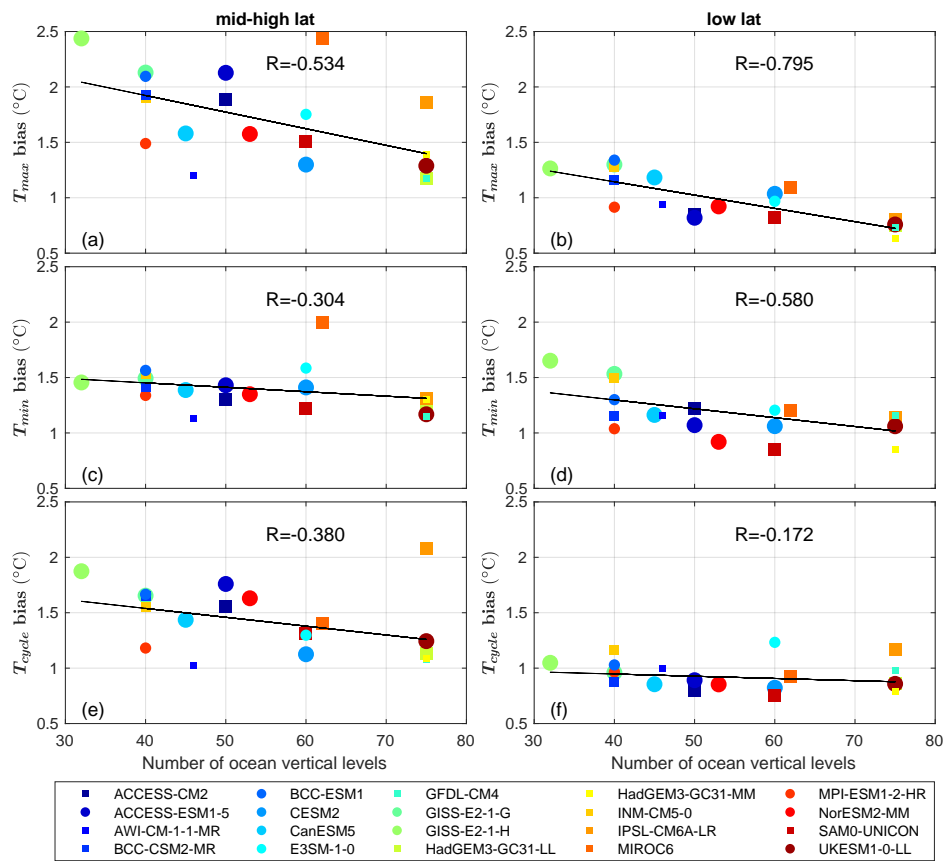

**Figure S1.** The area-weighted SST RMSE against total vertical levels for (a-b) mid-high latitudes (30°-90°) and (c-d) low latitudes 30°S-30°N.

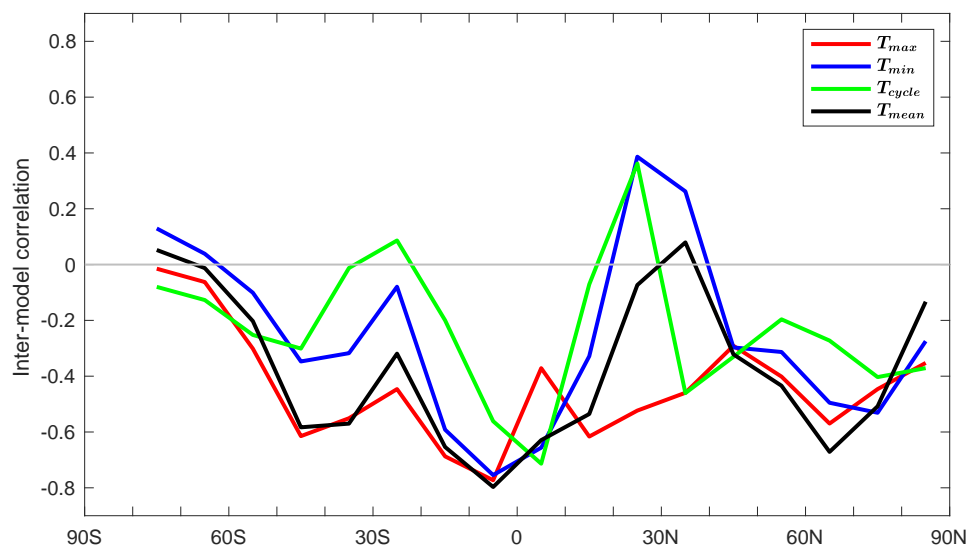

**Figure S2.** Inter-model correlation between number of ocean vertical levels and area-weighted RMSE in  $10^\circ$  latitude bands for  $T_{max}$ ,  $T_{min}$ ,  $T_{cycle}$  and  $T_{mean}$ .

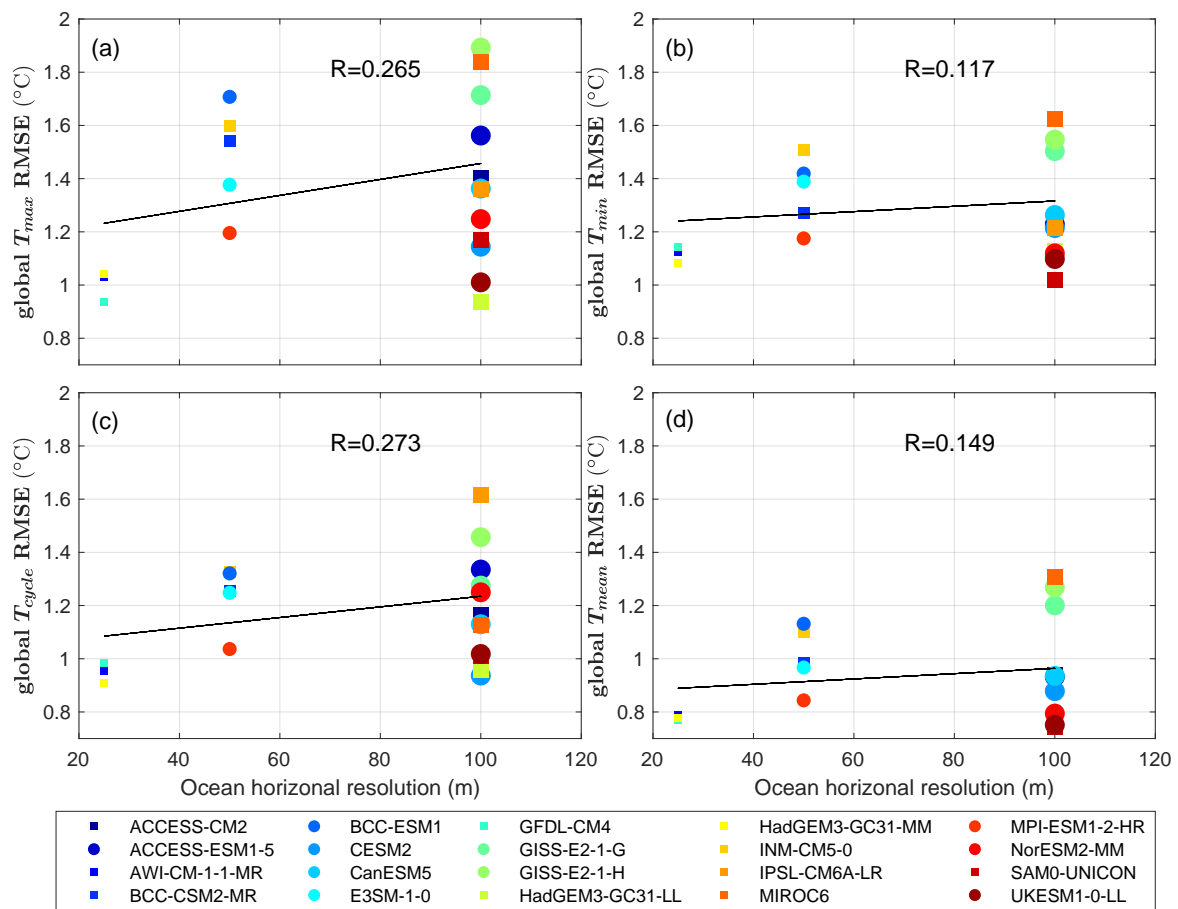

**Figure S3.** Global RMSE of (a)  $T_{max}$ , (b)  $T_{min}$ , (c)  $T_{cycle}$  and (d)  $T_{mean}$ , all against the ocean horizontal resolution.

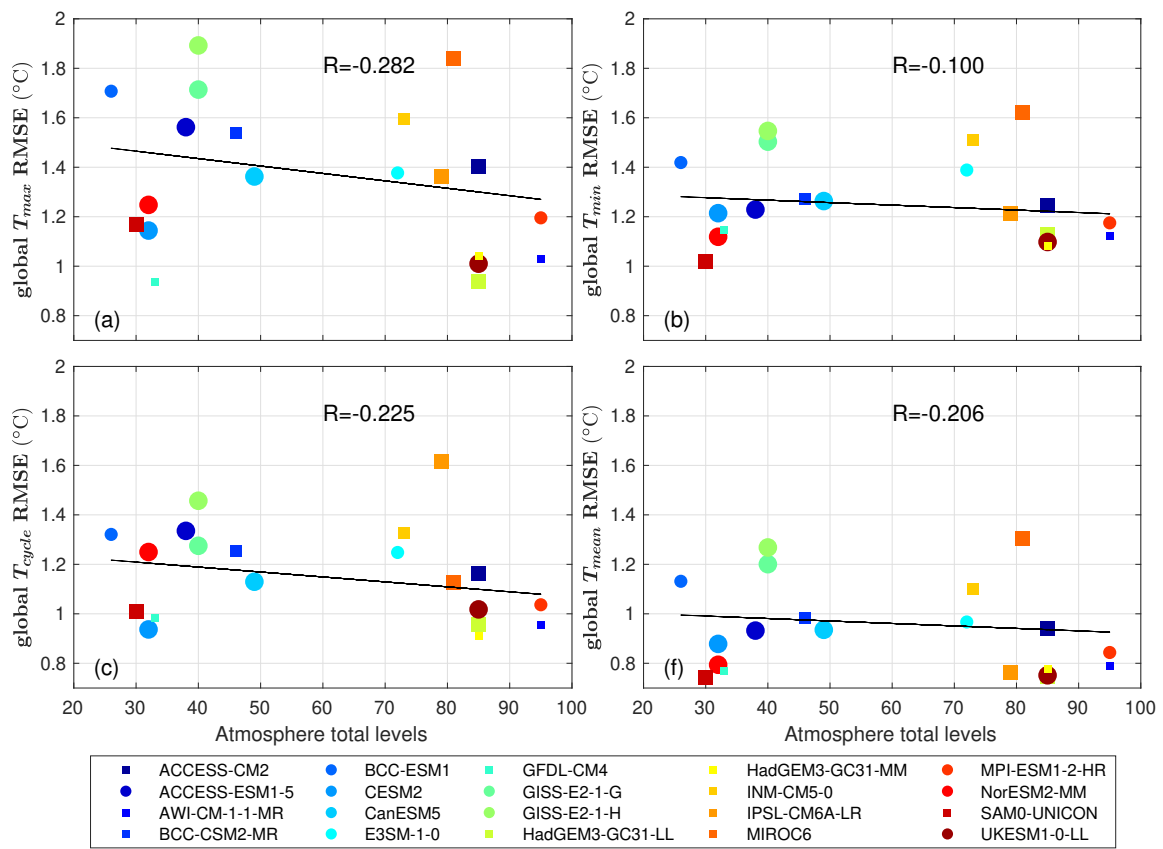

Figure S4. As Fig. S3, but for atmosphere vertical levels.

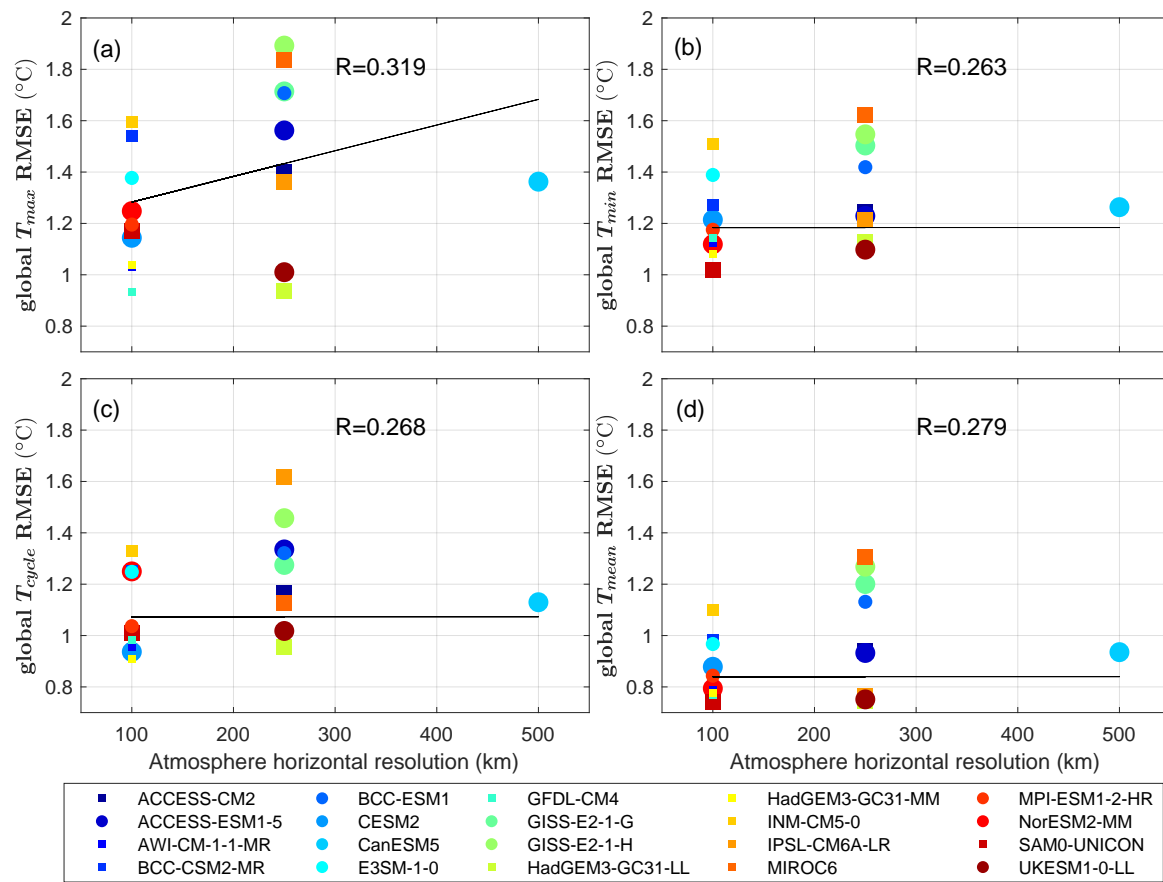

Figure S5. As Fig. S3, but for atmosphere horizontal resolution.

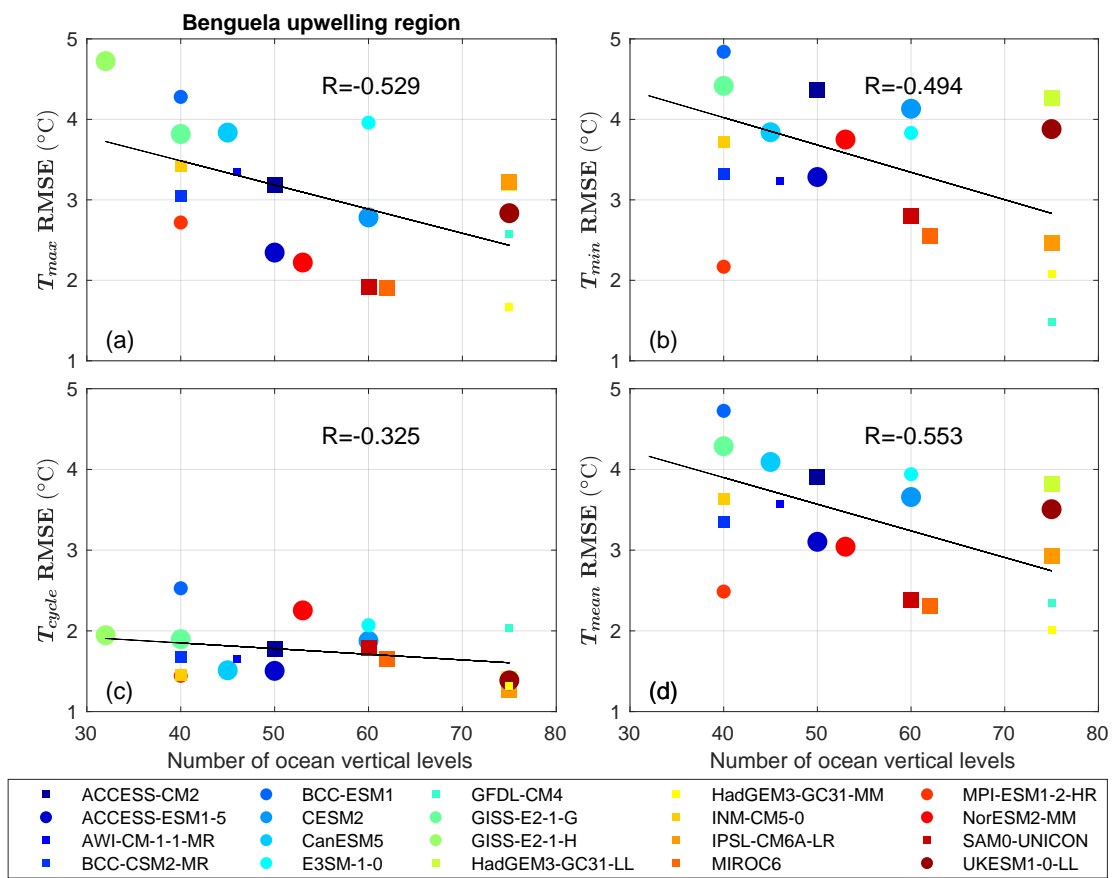

**Figure S6.** RMSE in Benguela upwelling region ( $18^{\circ}\text{S}$ - $28^{\circ}\text{S}$ , from the coast to 500 km offshore) of (a)  $T_{max}$ , (b)  $T_{min}$ , (c)  $T_{cycle}$  and (d)  $T_{mean}$ , all against the number of ocean vertical levels.

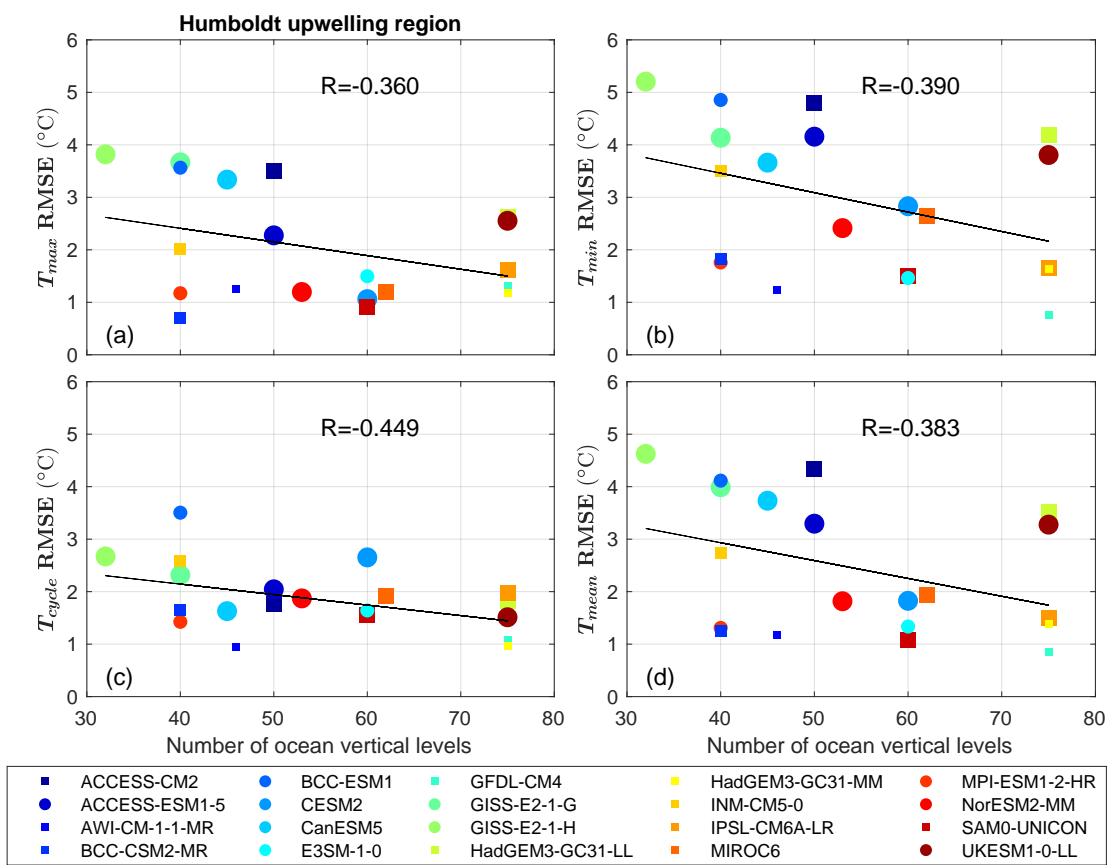

**Figure S7.** As in S6, but for Humboldt upwelling region ( $6^{\circ}\text{S}$ - $16^{\circ}\text{S}$ , from the coast to 500 km offshore).

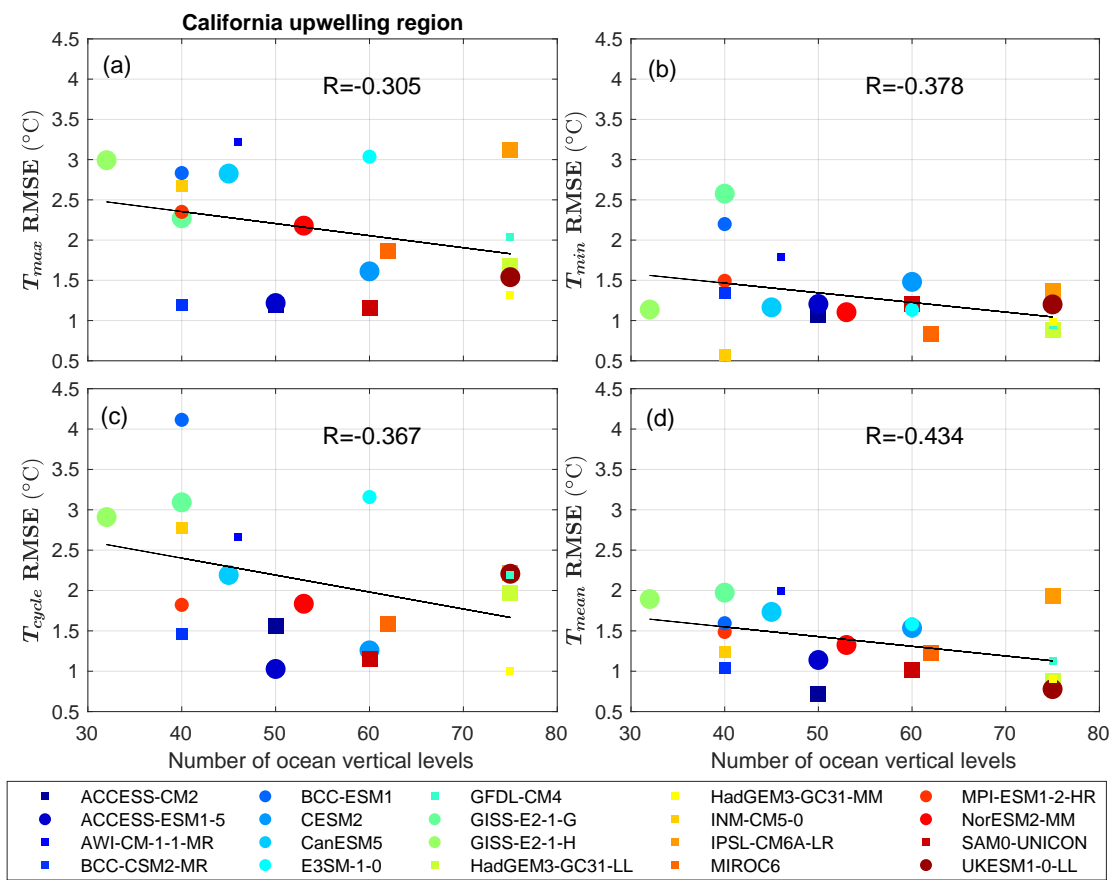

**Figure S8.** As in S6, but for California upwelling region (34°N-44°N, from the coast to 500 km offshore).



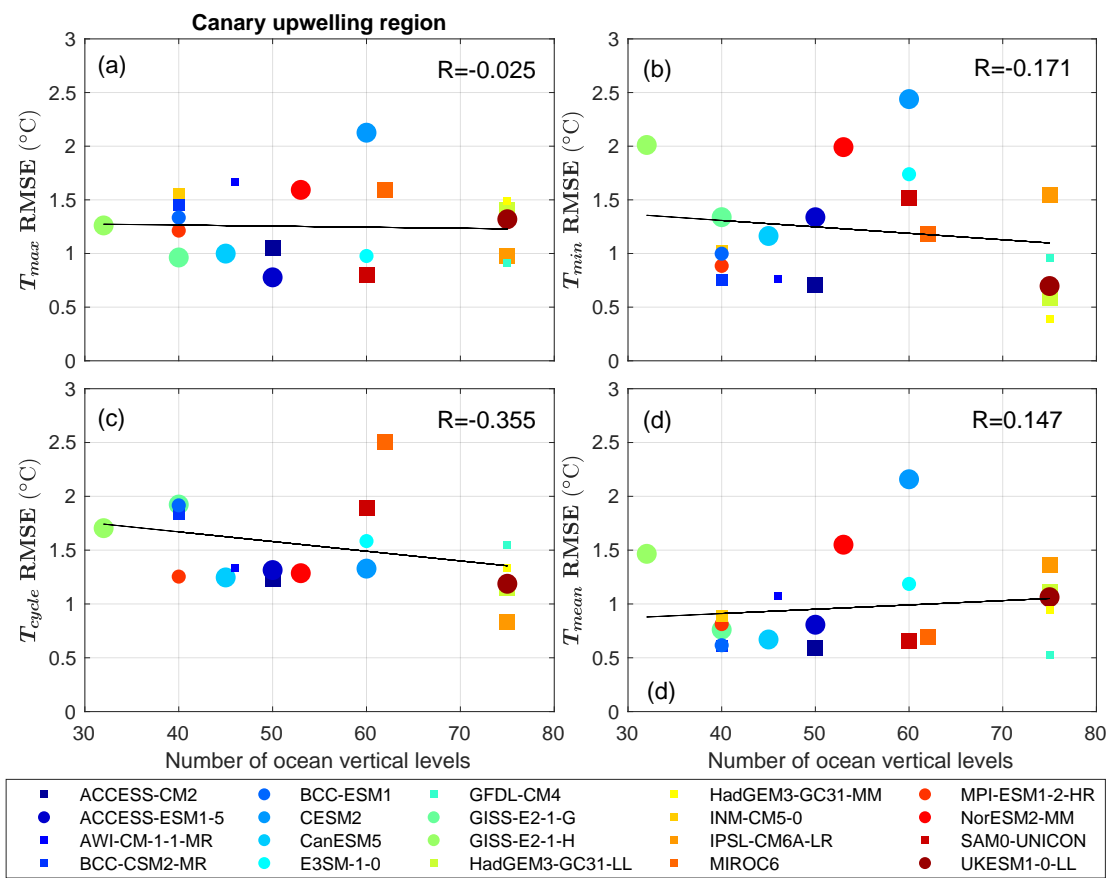

**Figure S9.** As in S6, but for Canary upwelling region ( $12^{\circ}\text{N}$ - $22^{\circ}\text{N}$ , from the coast to 500 km offshore).
